# Supplementary material
Source: PubMed Central journal article supplement (PMC6680213)
Supplement: SIM-34-796-s001.pdf [file SIM-34-796-s001.pdf]

## B. Supplementary Tables and Figures - Application

This appendix presents basic parameter estimates for each model for everybody and by sex (Table 5), followed by the results of the sensitivity analysis to misclassification of causes of death (Table 6), empirical and fitted survival curves and hazard functions for men and women, respectively (Figure 7), and goodness of fit of polyhazard models to the long-term general population data (Figure 8).

**Table 5.** Posterior means and 95% credible intervals for parameters in each model, for everybody and by sex

| Model         | Parameter   | Overall                 | Male                    | Female                  |
|---------------|-------------|-------------------------|-------------------------|-------------------------|
| Weibull       | $\alpha$    | 1.4209 (1.3990, 1.4430) | 1.4319 (1.4080, 1.4560) | 1.5732 (1.5190, 1.6290) |
|               | $\beta$     | 1.2587 (1.0290, 1.4740) | 1.2181 (0.9672, 1.4550) | 1.6639 (1.0370, 2.2210) |
|               | $\lambda$   | 0.0112 (0.0104, 0.0121) | 0.0122 (0.0112, 0.0132) | 0.0044 (0.0036, 0.0054) |
| Cox-like      | $\beta$     | 1.1996 (1.1222, 1.2784) | 1.1488 (1.0658, 1.2343) | 1.6412 (1.4412, 1.8569) |
| Poly-Weibull  | $\alpha_1$  | 1.3692 (1.3290, 1.4110) | 1.3945 (1.3520, 1.4380) | 1.4834 (1.3970, 1.5730) |
|               | $\alpha_2$  | 1.4412 (1.4160, 1.4660) | 1.4453 (1.4190, 1.4720) | 1.6066 (1.5350, 1.6720) |
|               | $\beta$     | 1.2742 (1.0520, 1.4800) | 1.2575 (1.0320, 1.4880) | 1.6578 (1.0560, 2.1590) |
|               | $\lambda_1$ | 0.0034 (0.0029, 0.0040) | 0.0036 (0.0031, 0.0042) | 0.0014 (0.0010, 0.0019) |
|               | $\lambda_2$ | 0.0078 (0.0071, 0.0085) | 0.0086 (0.0078, 0.0094) | 0.0031 (0.0024, 0.0040) |
| Poly-Gompertz | $\alpha_1$  | 0.0319 (0.0316, 0.0322) | 0.0328 (0.0324, 0.0332) | 0.0377 (0.0371, 0.0383) |
|               | $\alpha_2$  | 0.0320 (0.0317, 0.0323) | 0.0331 (0.0327, 0.0335) | 0.0380 (0.0374, 0.0386) |
|               | $\beta$     | 1.8108 (1.7025, 1.9267) | 1.7413 (1.6270, 1.8665) | 2.1230 (1.8823, 2.4350) |
|               | $\lambda_1$ | 0.0071 (0.0070, 0.0072) | 0.0079 (0.0077, 0.0080) | 0.0038 (0.0037, 0.0040) |
|               | $\lambda_2$ | 0.0187 (0.0185, 0.0189) | 0.0209 (0.0206, 0.0211) | 0.0106 (0.0103, 0.0108) |

**Table 6.** Sensitivity of estimates of expected survival to different rates of misclassification of causes of death in the population data. Posterior means and 95% credible intervals from the poly-Weibull model.

|                   | Proportion of deaths coded as arrhythmia which are wrongly classified |                    |                    |
|-------------------|-----------------------------------------------------------------------|--------------------|--------------------|
|                   | None                                                                  | 10%                | 20%                |
| <b>OVERALL</b>    |                                                                       |                    |                    |
| ICD mean survival | 9.18 (7.82, 10.78)                                                    | 8.99 (7.67, 10.57) | 8.83 (7.61, 10.29) |
| AAD mean survival | 6.06 (4.64, 7.76)                                                     | 5.99 (4.60, 7.68)  | 5.94 (4.60, 7.54)  |
| Life years gained | 3.12 (1.91, 4.31)                                                     | 3.00 (1.83, 4.14)  | 2.89 (1.76, 3.98)  |
| <b>MALE</b>       |                                                                       |                    |                    |
| ICD mean survival | 8.72 (7.36, 10.29)                                                    | 8.66 (7.33, 10.24) | 8.60 (7.32, 10.13) |
| AAD mean survival | 5.80 (4.42, 7.47)                                                     | 5.80 (4.41, 7.46)  | 5.78 (4.42, 7.42)  |
| Life years gained | 2.91 (1.76, 4.03)                                                     | 2.86 (1.74, 3.97)  | 2.82 (1.72, 3.90)  |
| <b>FEMALE</b>     |                                                                       |                    |                    |
| ICD mean survival | 9.96 (7.05, 14.68)                                                    | 9.97 (6.94, 14.53) | 9.87 (6.97, 14.20) |
| AAD mean survival | 6.85 (4.51, 10.74)                                                    | 6.89 (4.50, 10.61) | 6.85 (4.53, 10.40) |
| Life years gained | 3.11 (1.76, 4.75)                                                     | 3.08 (1.76, 4.66)  | 3.02 (1.73, 4.59)  |

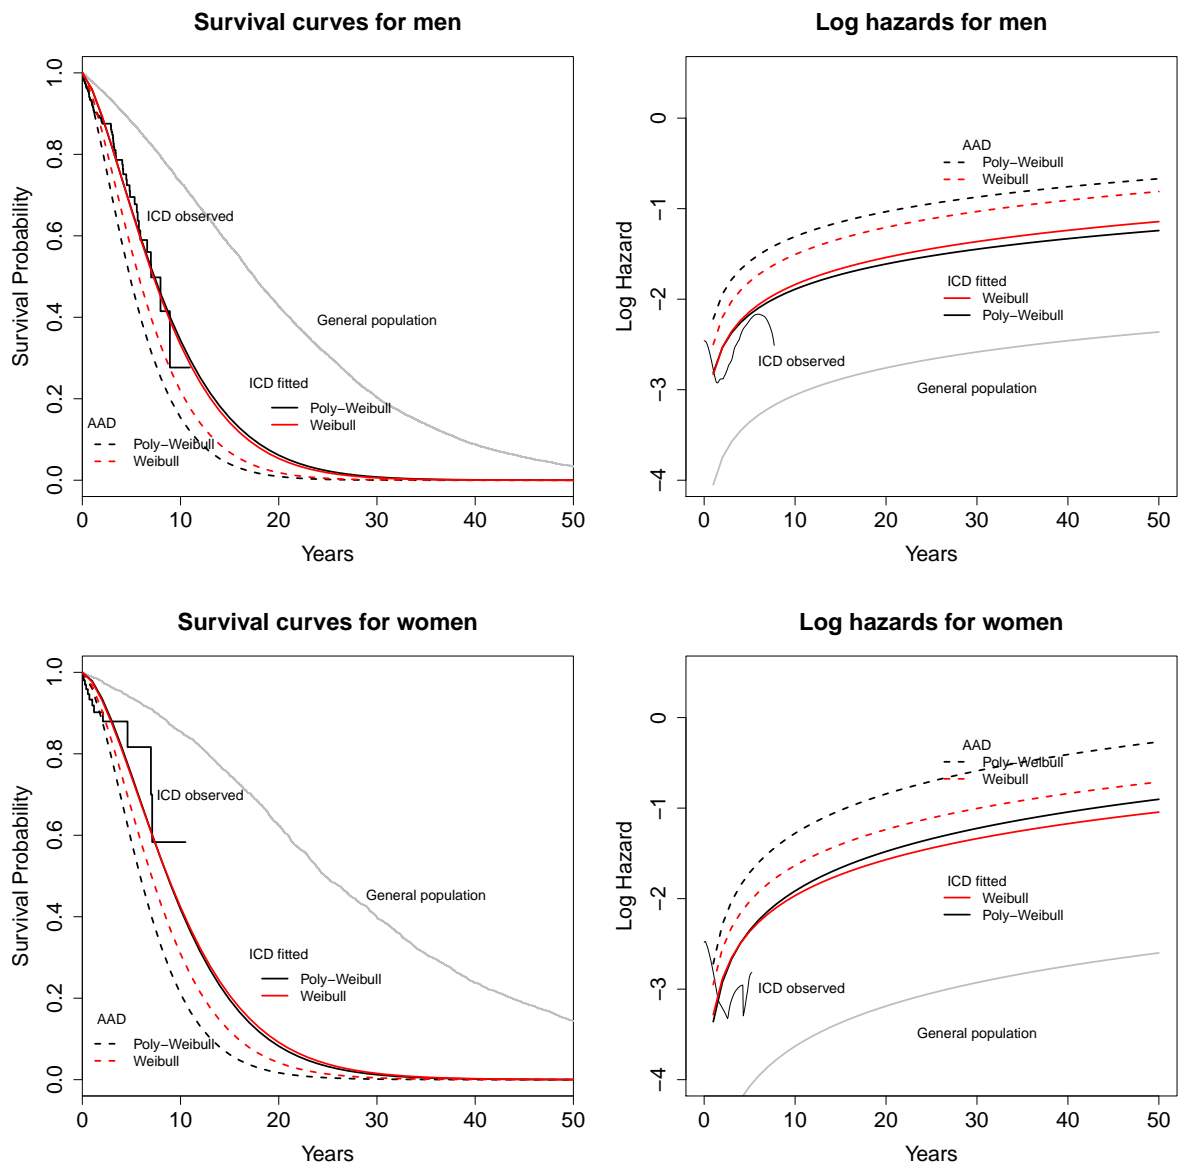

**Figure 7.** Survival curves and log hazards, for the ICD and AAD groups, fitted with the Poly-Weibull and Weibull models, for men (top) and women (bottom).

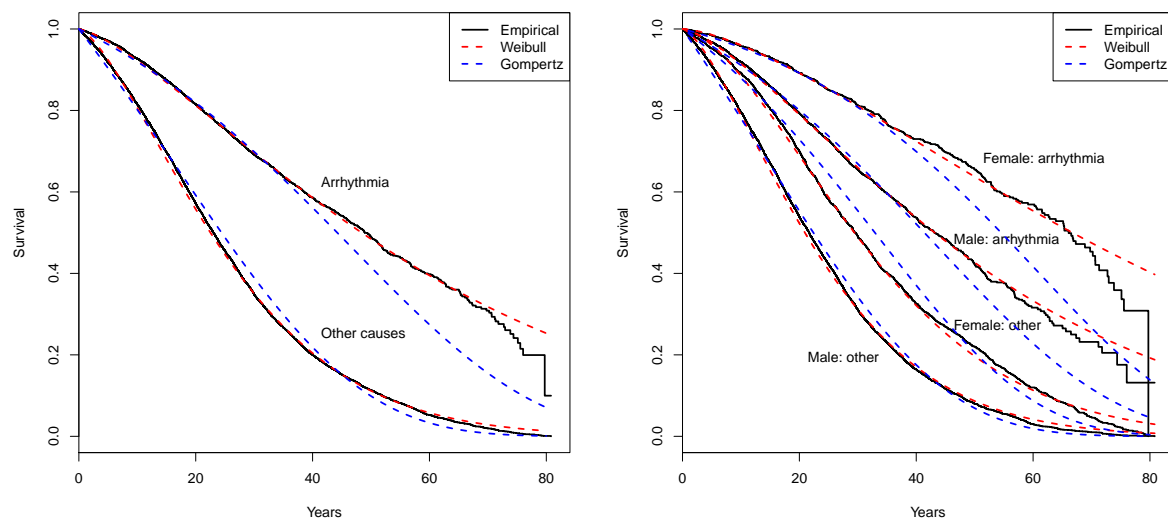

**Figure 8.** Fit of the Weibull and Gompertz distributions to the generated population cause-specific survival data (Kaplan-Meier estimates). Fitted values are the posterior means under the corresponding polyhazard models for the combined data. Left: overall, right: by gender.
